# Supplementary material for: A Novel OxyR Sensor and Regulator of Hydrogen Peroxide Stress with One Cysteine Residue in Deinococcus radiodurans
Source: PLOS journal article supplement (doi:10.1371/journal.pone.0001602), 2008-02-13
Supplement: S3 (10.1371/journal.pone.0001602.s003) [file journal.pone.0001602.s003]

Table S1. The repressed genes showed in MOxyR. All genes are sorted by fold induction or repression.

| Locus | Annotation | M | P |
| --- | --- | --- | --- |
| DR0096 | ABC Transporter with ATPase domain | -5.12704 | 2.68E-05 |
| DR1440 | Cation-transporting ATPase, authentic frameshift | -4.74244 | 0.000119 |
| DRA0157 | Periplasmic phosphate-binding protein PSTS | -4.47856 | 0.000648 |
| DR2209 | Rio1 family Protein kinase | -4.42562 | 5.80E-05 |
| DR1263 | Protein of uncharacterized conserved family predominantly in C elegansi | -4.38007 | 0.001641 |
| DRB0067 | Extracellular nuclease with Fibronectin III domains | -3.63096 | 4.75E-06 |
| DR0095 | ABC Transporter with ATPase domain | -3.53127 | 7.25E-05 |
| DRA0019 | NH2-acetyltransferase | -3.19338 | 0.002963 |
| DRA0159 | Phosphate transport permease PSTA | -3.06378 | 2.35E-05 |
| DR1624 | RNA helicase, authentic frameshift | -3.00083 | 2.01E-05 |
| DR2409 | McrA family nuclease | -2.65937 | 0.00069 |
| DR0548 | Pilin IV like secreted protein, most similar to leader peptidase IV, TAPA | -2.63356 | 1.20E-06 |
| DR0353 | VacB, S1 domain nuclease | -2.62564 | 5.28E-05 |
| DR1978 | NH2-acetyltransferase family | -2.59336 | 0.003969 |
| DR1998 | Catalase, CATX | -2.59086 | 0.000272 |
| DRA0020 | COBU cobinamide kinase/cobinamide phosphate guanylyltransferase | -2.47193 | 0.00179 |
| DRA0017 | Thioesterase | -2.4306 | 0.00152 |
| DR2449 | Small conserved bacterial proteins, YOHL_ECOLI | -2.37426 | 0.00625 |
| DR2339 | LigT, 2'-5' RNA LIGASE | -2.37082 | 0.001245 |
| DR0352 | Predicted protein | -2.30813 | 0.000498 |
| DR2441 | NH2-acetyltransferase | -2.274 | 0.000183 |
| DR0396 | Predicted protein | -2.21505 | 0.000548 |
| DR2453 | P-type ATPase metal efflux | -2.18394 | 0.00816 |
| DR0533 | Predicted protein | -2.13101 | 0.001366 |
| DR1630 | Conserved transport protein | -2.10621 | 0.012968 |
| DR1583 | Conserved membrane protein | -2.08896 | 0.000343 |
| DR1200 | Predicted protein | -2.02212 | 0.003261 |
| DR2385 | Phenylacetic acid degradation protein PaaB | -2.01609 | 0.000759 |
| DR0746 | Predicted protein | -2.0116 | 0.00016 |
| DR2208 | Glyoxalase/Dioxygenase family protein | -1.98719 | 0.01098 |
| DR1976 | MutS- Mismatch repair, ABC superfamily ATPase | -1.97696 | 0.00046 |
| DR1419 | P-loop containing protein, tunicamycin resistance protein ortholog | -1.9646 | 0.011378 |
| DR2384 | Phenylacetic acid degradation protein PaaC | -1.95686 | 3.92E-05 |
| DR1582 | Conserved membrane protein | -1.9147 | 0.000821 |
| DR0203 | Membrane protein, similar to gi|1653436 of Synechocystis | -1.89917 | 0.022306 |
| DR1907 | Fe-S subunit of glycolate oxidase, YKGE | -1.89843 | 0.007343 |
| DR2424 | Transposase, putative, authentic frameshift | -1.8642 | 0.014134 |
| DR1057 | NH2- Acetyltransferase | -1.85872 | 0.002539 |
| DR2617 | Cytochrome AA3 controlling protein, ctaA | -1.83778 | 0.013982 |
| DRB0068 | Secreted protein with Fibronectin III domains | -1.83031 | 0.001742 |
| DRA0158 | Phosphate transport system permease PSTA | -1.82102 | 0.006286 |
| DR2383 | MinD N- terminal domain, PaaD ortholog | -1.81413 | 0.002136 |
| DR0070 | Predicted protein | -1.75259 | 0.00157 |
| DR0265 | HTH transcription factor, GntR family | -1.73751 | 0.001003 |
| DR0763 | Probable N-acetyltransferase | -1.72881 | 0.015328 |
| DR0234 | Predicted protein | -1.72577 | 0.012119 |
| DR2338 | CinA ortholog, CinA MoeB family | -1.7181 | 0.000185 |
| DR0139 | OBG family GTPase | -1.71521 | 0.001565 |
| DRA0257 | Ankyrin repeat protein | -1.71139 | 0.00134 |
| DRB0106 | Acyl-CoA Thioesterase superfamily protein | -1.67655 | 0.000486 |
| DR2452 | Metal-binding subunit of ATPase metal efflux | -1.674 | 0.003755 |
| DR2574 | HTH transcription factor, phage type | -1.66145 | 0.000806 |
| DR0019 | FTSZ fragment | -1.6547 | 0.004408 |
| DR0821 | Acetylcholinesterase family protein | -1.64704 | 0.000738 |
| DRC0019 | Transposase | -1.63941 | 0.007761 |
| DR1927 | Transposase | -1.62917 | 0.02012 |
| DR2451 | Uncharacterized conserved protein containing duplicated domain with conserved HH motif | -1.6253 | 0.000907 |
| DR0905 | Uncharacterized protein similar to YGY4_HALSQ | -1.59605 | 0.006664 |
| DRB0116 | Predicted protein | -1.59156 | 0.021562 |
| DR1710 | Predicted protein | -1.58968 | 0.011425 |
| DR0346 | Cytochrome C-Type biogenesis protein CYCK | -1.54709 | 0.002106 |
| DR0204 | Membrane protein, similar to gi|1653967 of Synechocystis | -1.51905 | 0.002845 |
| DR0133 | Lipase, a/b superfamily hydrolase | -1.51018 | 0.003864 |
| DR2450 | Predicted protein | -1.50172 | 0.001483 |
| DR1581 | ABC ATPase, MDR type | -1.49726 | 0.000463 |
| DR1906 | L-lactate permease | -1.46065 | 4.23E-05 |
| DR1772 | Predicted protein | -1.45875 | 0.027799 |
| DR2308 | OBG family GTPase | -1.44114 | 0.002517 |
| DR1578 | Uncharacterized enzyme | -1.43832 | 0.002176 |
| DR0985 | Uncharacterized protein, bacillus YACC ortholog | -1.42953 | 0.040915 |
| DR1493 | NADH DEHYDROGENASE subunit M (NQO13) | -1.42658 | 0.005112 |
| DR1292 | Molybdenum cofactor biosynthesis protein B, MoaB protein | -1.41319 | 0.03044 |
| DR0663 | Predicted protein | -1.40573 | 0.003272 |
| DR2391 | Von-willebrand-factor A domain containing protein | -1.39864 | 0.010663 |
| DRB0104 | XerC-like recombinase | -1.39762 | 0.007296 |
| DRA0258 | Predicted protein | -1.38724 | 0.006715 |
| DR1161 | Transthyretin | -1.36976 | 0.001621 |
| DR2273 | Probable P-loop containing kinase, FlaR-like protein | -1.35361 | 0.004584 |
| DR1160 | Uricase | -1.34384 | 0.000961 |
| DR1799 | Initiation factor IF-2 | -1.34066 | 0.002127 |
| DR0342 | Iron sulfur protein, Rieske type | -1.3297 | 0.020873 |
| DR2470 | Conserved membrane protein, related to biothin biosysnthesis protein | -1.32586 | 0.027048 |
| DR1264 | Predicted protein | -1.31832 | 0.037004 |
| DR1505 | NADH DEHYDROGENASE subunit B (NQO6) | -1.31695 | 0.037111 |
| DRB0051 | Predicted protein | -1.3069 | 0.037905 |
| DR2524 | Ribosomal protein L28 | -1.30687 | 0.005166 |
| DR0003 | Predicted protein | -1.29379 | 0.012489 |
| DR1996 | Fatty acid/phospholipid synthesis protein PlsX, authentic frameshift | -1.27542 | 0.005167 |
| DR2051 | ABC Transporter ATPase, MDR-type | -1.27332 | 0.003207 |
| DR2618 | Cytochrome c oxidase assembly factor, ctaB | -1.27331 | 0.000896 |
| DR0046 | L-rich repeats containing protein | -1.2663 | 0.041338 |
| DR1558 | Receiver domain (flavodoxin, CHEY family) of 2 component system + C- terminal HTH | -1.24785 | 0.043023 |
| DR0906 | DNA gyrase B subunit, GYRB | -1.24773 | 0.005522 |
| DR1190 | Conserved membrane protein | -1.24692 | 0.023465 |
| DRB0069 | Subtilisin serine protease | -1.24029 | 0.000565 |
| DR1359 | NlpA like Lipoprotein | -1.2352 | 0.002205 |
| DR2374 | Ribonucleotide reductase, archeal type | -1.2309 | 0.013401 |
| DR0126 | in, authentic frameshift | -1.2276 | 0.002258 |
| DRB0107 | NRDI ribonucleoprotein | -1.22526 | 0.002171 |
| DRB0111 | Glycerophosphodiester phosphodiesterase | -1.20099 | 0.009128 |
| DR2340 | RecA | -1.19142 | 0.007686 |
| DR0205 | ABC transporter ATPase | -1.1875 | 0.019387 |
| DR0438 | Predicted protein | -1.18712 | 0.004462 |
| DR1575 | Predicted protein | -1.18464 | 0.049463 |
| DR1482 | 2-isopropylmalate synthase, LEU1 | -1.16947 | 0.000901 |
| DR2439 | Yfit/DinB family protein | -1.16782 | 0.001723 |
| DR0343 | Cytochrome oxidase family protein | -1.15833 | 0.007039 |
| DR1796 | Small highly conserved protein always associated with the NusA gene | -1.1567 | 0.002023 |
| DR2427 | Shares a domain with YjiI | -1.1556 | 0.004486 |
| DR0292 | Conserved secreted small protein related to TatA/TatB of e.coli. | -1.15033 | 0.017964 |
| DR2381 | MaoC like aldehyde dehydrogenase, PaaZ | -1.11905 | 0.007563 |
| DR1995 | Conserved membrane protein | -1.1132 | 0.003712 |
| DR1904 | Predicted protein | -1.10424 | 0.004347 |
| DR1356 | ABC transporter, ATP-binding protein | -1.09887 | 0.013557 |
| DRA0248 | Transcriptional regulator, MarR/SlyA family | -1.09256 | 0.011031 |
| DR1577 | QueA ortholog, S-adenosylmethionine:trna ribosyltransferase-isomerase | -1.08947 | 0.000535 |
| DR0460 | Acetyl-CoA synthetase | -1.07283 | 0.011562 |
| DR1189 | Methylmalonyl-CoA mutase | -1.06786 | 0.001949 |
| DR0127 | Ankyrin repeats related protein | -1.04611 | 0.023765 |
| DR0156 | Riboflavin synthase beta subunit, RisB | -1.04114 | 0.034828 |
| DR1797 | NusA | -1.03718 | 0.005014 |
| DR1118 | PilT N-terminal domain like protein, merged with transmembrane segments | -1.03345 | 0.016045 |
| DR2115 | Ribosomal protein L15 | -1.02713 | 0.010582 |
| DR2440 | YohI/YHDG family of TIM barrel dinucleotide binding enzymes | -1.0183 | 0.013943 |
| DR2386 | MaoC like aldehyde dehydrogenase PaaA | -1.01801 | 0.004797 |
| DR1198 | TYPA like GTPase | -1.01161 | 0.022671 |
| DR2225 | Tellurium resistance/ dictyostelium cAMP binding family of proteins | -1.00289 | 0.001629 |
| DR2243 | PhoU ortholog | -1.0013 | 0.019722 |
| DR2078 | Extracellular lipase, a/b fold hydrolase | -1.00129 | 0.010627 |
| DR0053 | DinB/YfiT family of proteins | -1.00048 | 0.033451 |
