# Supplementary material for: A Novel OxyR Sensor and Regulator of Hydrogen Peroxide Stress with One Cysteine Residue in Deinococcus radiodurans
Source: PLOS journal article supplement (doi:10.1371/journal.pone.0001602), 2008-02-13
Supplement: S4 (10.1371/journal.pone.0001602.s004) [file journal.pone.0001602.s004]

Table S2. The induced genes showed in MOxyR. All genes are sorted by fold induction or repression.

| Locus | Annotation | M | P |
| --- | --- | --- | --- |
| DRA0211 | HTH transcriptional regulator, GntR family | 3.675916 | 0.001481 |
| DR0959 | ABC transporter permease dipeptide transporter? | 3.615868 | 6.45E-05 |
| DRA0154 | Glutamine-fructose-6-phosphate transaminase, GLMS | 3.518807 | 0.001715 |
| DR1930 | Membrane protein | 3.14466 | 0.002494 |
| DR1317 | Predicted protein | 2.975583 | 0.000207 |
| DR1312 | Nuclease McrA superfamily | 2.847438 | 0.003462 |
| DRA0343 | Succinic semialdehyde dehydrogenase | 2.807892 | 0.001363 |
| DR2576 | DHH family phosphohydrolase | 2.662988 | 0.00431 |
| DR1790 | Yellow/royal jelly protein of insects | 2.621214 | 0.000236 |
| DR1901 | Predicted protein | 2.61182 | 0.004591 |
| DR1225 | Glycosyltransferase | 2.530316 | 0.005089 |
| DR2006 | Predicted protein | 2.45666 | 0.005599 |
| DRB0017 | Vibriobactin utilization protein viub | 2.45529 | 0.005609 |
| DR1385 | Predicted protein | 2.413336 | 0.00164 |
| DR1809 | Glycine dehydrogenase | 2.408102 | 6.59E-05 |
| DR2181 | RAB/RAS like small bacterial GTPase | 2.407659 | 0.00012 |
| DR1231 | Predicted protein | 2.402131 | 0.001626 |
| DR1811 | Glycine cleavage system H protein | 2.335541 | 0.001147 |
| DR2179 | Predicted protein | 2.306999 | 3.11E-05 |
| DRA0064 | Thermostable? alkaline proteinase | 2.294918 | 0.006969 |
| DRA0245 | Predicted protein | 2.202938 | 0.007939 |
| DR0645 | MobA | 2.179391 | 0.008214 |
| DRA0192 | Predicted protein | 2.142951 | 0.008664 |
| DRA0333 | Zn-finger + FHA domain containing protein | 2.099047 | 0.000166 |
| DRB0036 | Oxidoreductase, authentic point mutation | 2.057709 | 0.015962 |
| DRA0230 | Predicted protein | 2.017625 | 0.000262 |
| DRA0331 | VWFA Mg-binding domain protein | 1.990624 | 0.000166 |
| DR0995 | Protein of uncharacterized conserved family | 1.949141 | 0.008895 |
| DR2182 | Predicted protein | 1.945342 | 0.003993 |
| DR2180 | Uncharacterized small family of predominantly archaeal proteins | 1.921042 | 0.00011 |
| DR2249 | Protein phosphatase, calcineurin like phosphoesterase | 1.909353 | 0.01243 |
| DRA0334 | Serine/Threonine kinase | 1.876213 | 0.000141 |
| DR1623 | Predicted protein | 1.869936 | 0.016431 |
| DR1620 | 3-ketoacyl-acyl carrier protein reductase | 1.867602 | 0.000962 |
| DR0751 | Cell division topological specificity factor, MinE | 1.836379 | 0.000263 |
| DRA0335 | Serine/threonine protein kinase | 1.835669 | 0.000293 |
| DR1202 | Predicted protein | 1.805076 | 0.014771 |
| DR1222 | Acetyl-xylan esterase, NODB-like deacetylase | 1.798468 | 0.014937 |
| DR0251 | Probable ribose/galactose ABC transporter | 1.789405 | 0.015169 |
| DR1844 | NH2-acetyltransferase | 1.785362 | 0.001144 |
| DR1185 | Surface protein | 1.777477 | 0.000718 |
| DR0894 | Predicted protein | 1.769102 | 0.002955 |
| DR1944 | Predicted protein | 1.73132 | 0.000206 |
| DR0105 | LEA76 family desiccation resistance protein | 1.713718 | 0.000177 |
| DR1323 | TRNA pseudouridine synthase TruB | 1.712974 | 0.017314 |
| DR1717 | Racemase, L-carnitine Dehydratase family enzyme | 1.709796 | 0.037424 |
| DR1348 | Predicted protein | 1.68558 | 0.000642 |
| DR1179 | HKD superfamily hydrolase | 1.684324 | 0.000231 |
| DR1943 | 3-oxoacyl-acyl-carrier-protein reductase, FabG | 1.657072 | 0.00019 |
| DR1340 | Uncharacterized protein | 1.656865 | 0.003103 |
| DR1596 | Glucose-6-phosphate 1-dehydrogenase | 1.652452 | 0.000527 |
| DR2407 | Predicted membrane protein, uncharacterized | 1.647071 | 0.000399 |
| DR1755 | Predicted protein | 1.627818 | 0.002376 |
| DR2553 | Sugar kinase (Ribokinase RbsK superfamily), fructokinase | 1.621909 | 0.020389 |
| DRA0007 | NODI ABC ATPase | 1.610955 | 0.020803 |
| DRB0014 | Periplasmic binding protein HutB | 1.606685 | 0.005902 |
| DR0274 | MutT family hydrolase | 1.604824 | 0.021039 |
| DR1232 | Pilin IV like secreted protein | 1.594457 | 0.010676 |
| DR0709 | UDP-glucose 4-epimerase | 1.586616 | 0.021761 |
| DR0998 | MinD family ATpase, MRP | 1.573951 | 0.022282 |
| DR1162 | Transcription elongation factor GreA | 1.563238 | 0.002249 |
| DR0854 | Small family of predominantly archaeal proteins | 1.560039 | 0.001899 |
| DR0442 | PilT protein, ATPase | 1.556802 | 0.000983 |
| DR1203 | N-term. domain of lmbE family protein, chracteristic HPDD motif | 1.551107 | 0.02326 |
| DR0201 | Predicted protein | 1.548435 | 0.00141 |
| DR1812 | Aminomethyltransferase, glycine cleavage system T protein | 1.538327 | 0.015886 |
| DR2559 | Predicted protein | 1.521312 | 0.001072 |
| DR1708 | Predicted protein | 1.51489 | 3.49E-05 |
| DR1067 | Predicted protein | 1.506497 | 0.000906 |
| DR2240 | Predicted protein | 1.494368 | 0.001259 |
| DR1697 | Predicted protein | 1.492888 | 0.006795 |
| DR1595 | 6-phosphogluconate dehydrogenase | 1.462784 | 0.000652 |
| DR1897 | Predicted protein | 1.455628 | 0.000552 |
| DR1616 | Uncharacterized conserved membrane | 1.453089 | 0.00048 |
| DR1314 | Uncharacterized proteins, ysnf-like repeats | 1.424399 | 0.000105 |
| DRB0032 | Predicted protein | 1.423798 | 0.029799 |
| DRB0027 | Fusion anti-sigma B factor RSBT/TORS + RSBX regulator | 1.413582 | 9.66E-05 |
| DR0407 | Membrane protein related to cytochrome c maturation protein B | 1.405868 | 0.030893 |
| DRA0065 | Chromosomal protein HU HupA | 1.399851 | 0.01102 |
| DR1804 | Solo Double stranded beta helix protein, curC | 1.397082 | 0.000896 |
| DR0413 | Predicted protein | 1.395186 | 0.024074 |
| DR1963 | PilT-like ATPase | 1.394994 | 0.010459 |
| DR1987 | Predicted protein | 1.390382 | 0.000202 |
| DR0399 | Triple fascilin-like repeat, possible cell surface protein | 1.382084 | 0.00126 |
| DRA0164 | Thioredoxin | 1.370889 | 0.033174 |
| DR0644 | Predicted protein | 1.370862 | 0.001019 |
| DR0422 | SAM dependent methyltransferase | 1.370377 | 0.033209 |
| DR1896 | Predicted protein | 1.368249 | 0.002502 |
| DR0371 | Predicted protein | 1.363283 | 0.007263 |
| DR0923 | Uncharacterized ortholog of Mycobacterial and Cyanobacterial proteins | 1.358518 | 0.03403 |
| DR2433 | Protein of nitrilase/amidohydrolase family | 1.356035 | 0.034205 |
| DRA0354 | Similar to methyl-accepting chemotaxis protein PIL operon? | 1.321465 | 0.017302 |
| DR1803 | Predicted protein | 1.319007 | 0.048071 |
| DRA0194 | a/b hydrolase | 1.311463 | 0.008746 |
| DR0891 | Receiver domain, CHEY family + HTH domain | 1.311026 | 0.001034 |
| DRA0364 | ADG Oxidoreductase | 1.310185 | 0.001306 |
| DRA0352 | PILJ ortholog, similar to methyl-accepting chemotaxis protein | 1.310137 | 0.005147 |
| DR1214 | Acetyl-CoA carboxylase alpha subunit, ACCA | 1.309377 | 0.00701 |
| DR0972 | Uncharacterized secreted protein | 1.303353 | 0.001052 |
| DR1945 | Malonyl Acyl Carrier Transcyclase, FabD | 1.298238 | 0.003143 |
| DRA0005 | NAD alcohol dehydrogenase | 1.291897 | 0.039132 |
| DR1341 | Diverged aldoketomutase of glyoxalase I family | 1.275152 | 0.00118 |
| DR1571 | Oligopeptide binding protein; oligopeptide transporter OppA | 1.271434 | 0.008638 |
| DR1893 | Cyclophilin, peptidyl-prolyl isomerase | 1.270096 | 0.000116 |
| DR1146 | GSP26 general stress like protein | 1.266566 | 0.001413 |
| DRC0007 | Diverged PP-loop ATPase related to ExsB, 4 conserved C | 1.264754 | 0.041477 |
| DR1066 | Predicted protein | 1.262731 | 0.026503 |
| DR2344 | Predicted protein | 1.260203 | 2.42E-06 |
| DR2097 | Predicted protein | 1.259693 | 0.041932 |
| DR1890 | Rossman fold oxidoreductase | 1.249228 | 0.001197 |
| DR1768 | Predicted protein | 1.249179 | 0.000375 |
| DR1837 | Predicted protein | 1.234899 | 0.044256 |
| DR1879 | Conserved membrane protein | 1.231965 | 0.005824 |
| DR0593 | Alpha/beta hydrolase superfamily protein | 1.228318 | 0.020911 |
| DR1383 | Predicted protein | 1.22819 | 0.001289 |
| DR1199 | Protease I, related to general stress protein 18, ThiJ superfamily protein | 1.222644 | 0.008486 |
| DR1172 | Lea76/LEa29-like desiccation resistance protein | 1.219626 | 7.70E-05 |
| DR0632 | Related to YAFD_ECOLI | 1.210994 | 0.046645 |
| DR1331 | Predicted protein | 1.207284 | 0.002401 |
| DRA0036 | Possible membrane protein | 1.200665 | 0.000199 |
| DR2406 | HGG containing thioesterase superfamily | 1.190824 | 0.004703 |
| DR1306 | Predicted protein | 1.182983 | 0.007313 |
| DR2070 | Conserved lipoprotein | 1.180532 | 0.04992 |
| DR0716 | Nitrate reductase | 1.170034 | 0.004083 |
| DR2234 | Diacylglycerol Kinase family protein | 1.165569 | 0.044406 |
| DR0615 | HTH transcriptional regulator, LysR family | 1.158116 | 0.005139 |
| DR2596 | Possible metalloprotease | 1.136731 | 0.00928 |
| DR2527 | Predicted protein | 1.129644 | 0.002913 |
| DR1597 | OPCA, OxPPCycle gene, involved in the assembly of above protein | 1.125841 | 0.002286 |
| DR1290 | Periplasmic peptide binding protein | 1.125266 | 0.004846 |
| DR0781 | Receiver domain, CHEY family + HTH domain | 1.121185 | 0.000696 |
| DR0711 | UDP-glucose-4-epimerase | 1.118734 | 0.042181 |
| DR2188 | Aminopeptidase T, AMP2 | 1.115389 | 0.006424 |
| DR0685 | Uncharacterized secreted protein | 1.101534 | 0.000489 |
| DR1980 | NADH dehydrogenase, Rossman fold oxidoreductase | 1.100141 | 0.00147 |
| DR0845 | Ribose 5-phosphate isomerase, RPIA | 1.097495 | 0.001756 |
| DR1874 | GMP synthase, PP-loop ATPase | 1.086703 | 0.013496 |
| DR2310 | Predicted protein | 1.084224 | 0.005503 |
| DR1361 | Bacterial DCSG sequence containing hydrolase | 1.079959 | 0.000303 |
| DR2438 | Endonuclease III, alpha helical glycosidase superfamily | 1.071743 | 0.002349 |
| DR0106 | Predicted protein | 1.070854 | 0.004271 |
| DRB0054 | Predicted protein | 1.061976 | 0.005449 |
| DR1840 | Predicted protein | 1.056885 | 0.005359 |
| DR1253 | Predicted protein | 1.035494 | 0.011229 |
| DR1220 | HTH repressor FeoA | 1.035212 | 0.015288 |
| DR1662 | Threonine 3-dehydrogenase | 1.03423 | 0.002452 |
| DR1215 | Acetyl-CoA carboxylase beta subunit, ACCD | 1.028654 | 0.008965 |
| DRA0037 | Glycosyltransferase | 1.014303 | 0.001305 |
| DR0888 | Some domain + invasin domain protein | 1.010724 | 0.003399 |
| DR2235 | PHP family phosphoesterase | 1.006371 | 0.033357 |
